# Supplementary material
Source: HighWire-hosted journal article supplement (https://www.rcpjournals.org/highwire/filestream/8599/field_highwire_adjunct_files/0/Roberts_S1_Responses_to_all_survey_2.pdf)
Supplement: Roberts_S1_Responses_to_all_survey_2.pdf [file Roberts_S1_Responses_to_all_survey_2.pdf]

## Supplementary File – Survey questions and responses relating to PA impact on PGME

### Junior Doctor Responses

Unless otherwise stated, the following questions relate to your experiences whilst working in a department with a physician associate. If you have since rotated to a different clinical area that does not employ a physician associate, please refer back to your previous experience.

|                                                                                                         | 0 | 1-2 | 3-4 | 5-6 | 7-8 | >8 |
|---------------------------------------------------------------------------------------------------------|---|-----|-----|-----|-----|----|
| How many educational meetings are/were available for you to attend each month in your department/trust? | 1 | 7   | 17  | 4   | 8   | 5  |
| On average, how many of these would you attend each month?                                              | 3 | 15  | 12  | 10  | 1   | 1  |

|                                                                         | <50% | 50-59% | 60-69% | 70-79% | 80-89% | 90-100% |
|-------------------------------------------------------------------------|------|--------|--------|--------|--------|---------|
| What percentage of your mandatory training do/did you manage to attend? | 1    | 4      | 8      | 10     | 12     | 7       |

|                                                                                            | Every week | Every fortnight | Monthly | Every other month | Several times a year | Once or twice a year | Annually | Never |
|--------------------------------------------------------------------------------------------|------------|-----------------|---------|-------------------|----------------------|----------------------|----------|-------|
| How often are/were you prevented from attending training events due to staffing shortages? | 5          | 8               | 9       | 3                 | 2                    | 10                   | 1        | 4     |

With regards to your recent experience of working with one or more newly qualified physician associate, please indicate to what extent you agree with the following statements.

|                                                                                    | Strongly Disagree | Disagree | Neutral | Agree | Strongly Agree |
|------------------------------------------------------------------------------------|-------------------|----------|---------|-------|----------------|
| Their presence increased the departmental skills mix                               | 3                 | 7        | 12      | 14    | 6              |
| Their presence reduced the impact of staff shortages                               | 1                 | 7        | 5       | 23    | 6              |
| Their presence relieved pressure from other members of staff                       | 2                 | 4        | 3       | 27    | 6              |
| The presence of a PA reduced my ability to attend organised teaching/training      | 23                | 12       | 4       | 3     | 0              |
| The presence of a PA reduced my ability to obtain workplace based assessments      | 21                | 13       | 1       | 6     | 1              |
| The presence of a PA reduced the availability of ward based teaching opportunities | 24                | 11       | 4       | 2     | 1              |

|                                                                                                    |    |    |    |    |   |
|----------------------------------------------------------------------------------------------------|----|----|----|----|---|
| The presence of a PA reduced my ability to be trained in practical procedures                      | 20 | 13 | 5  | 2  | 2 |
| The presence of a PA had an overall negative impact on my training                                 | 23 | 11 | 4  | 3  | 1 |
| The presence of a PA had overall no impact on my training                                          | 6  | 8  | 7  | 16 | 5 |
| The presence of a PA meant that I was more likely to be able to attend organised teaching/training | 6  | 12 | 8  | 14 | 2 |
| I can recall learning from/being taught by a PA                                                    | 16 | 19 | 3  | 3  | 1 |
| My training was enhanced by working with a PA                                                      | 9  | 11 | 8  | 13 | 1 |
| Their presence increased training opportunities for junior doctors                                 | 4  | 14 | 17 | 4  | 3 |
| Their presence contributed to the induction of new members of staff                                | 2  | 12 | 13 | 12 | 3 |
| Their presence contributed to the training of other members of staff                               | 3  | 18 | 16 | 1  | 2 |
| Training opportunities for junior doctors were diverted to the Physician Associate                 | 9  | 19 | 5  | 8  | 1 |
| Their presence had an overall negative impact on medical training in the department                | 13 | 18 | 6  | 5  | 0 |

### Consultant Responses

With regards to your recent experience of working with one or more newly qualified physician associate, please indicate to what extent you agree with the following statements.

|                                                                                     | Strongly Disagree | Disagree | Neutral | Agree | Strongly Agree |
|-------------------------------------------------------------------------------------|-------------------|----------|---------|-------|----------------|
| Their presence increased the departmental skills mix                                | 1                 | 1        | 3       | 7     | 4              |
| Their presence reduced the impact of staff shortages                                | 1                 | 0        | 2       | 7     | 6              |
| Their presence relieved pressure from other members of staff                        | 0                 | 2        | 1       | 9     | 4              |
| Their presence increased training opportunities for junior doctors                  | 0                 | 4        | 6       | 3     | 3              |
| Their presence contributed to the induction of new members of staff                 | 0                 | 5        | 5       | 4     | 2              |
| Their presence contributed to the training of other members of staff                | 1                 | 5        | 5       | 4     | 1              |
| Training opportunities for junior doctors were diverted to the Physician Associate  | 5                 | 5        | 3       | 3     | 0              |
| Their presence had an overall negative impact on medical training in the department | 7                 | 7        | 2       | 0     | 0              |

### PA Responses

|  | Strongly Disagree | Disagree | Neutral | Agree | Strongly Agree |
|--|-------------------|----------|---------|-------|----------------|
|  |                   |          |         |       |                |

|                                                                            |   |   |   |   |   |
|----------------------------------------------------------------------------|---|---|---|---|---|
| My role has increased departmental skill mix                               | 0 | 0 | 1 | 6 | 3 |
| My role has reduced the impact of staff shortages                          | 0 | 0 | 0 | 5 | 5 |
| My role has relieved pressure from other members of staff                  | 0 | 0 | 2 | 1 | 7 |
| My role has increased training opportunities for junior doctors            | 0 | 1 | 5 | 1 | 3 |
| My role has contributed to induction of new members of staff in the future | 0 | 1 | 3 | 4 | 2 |
| My role has contributed to training other members of staff                 | 0 | 2 | 4 | 1 | 3 |
| There is sufficient organised teaching provided in my job                  | 0 | 1 | 1 | 4 | 4 |
| I am able to attend the organised teaching provided                        | 0 | 0 | 1 | 5 | 4 |
| I am provided with sufficient informal learning opportunities              | 0 | 1 | 2 | 3 | 4 |
| Teaching provided by my department is appropriate to my level              | 0 | 0 | 2 | 3 | 5 |
| PA specific teaching provided by the trust is meets my needs               | 0 | 0 | 3 | 1 | 6 |
